# Supplementary material for: Antifungal activity of Co(II) and Cu(II) complexes containing 1,3-bis(benzotriazol-1-yl)-propan-2-ol on the growth and virulence traits of fluconazole-resistant Candida species: synthesis, DFT calculations, and biological activity
Source: PubMed Central journal article supplement (PMC10563319; doi:10.1186/s13065-023-01037-7), 2023-10-10
Supplement: 13065_2023_1037_MOESM1_ESM.pdf [file 13065_2023_1037_MOESM1_ESM.pdf]

## Supplementary Material

### **Antifungal activity of Co(II) and Cu(II) complexes containing 1,3-bis(benzotriazol-1-yl)-propan-2-ol on the growth and virulence traits of fluconazole-resistant *Candida* species: Synthesis, DFT calculations, and biological activity**

Ricardo A. Murcia-Galan<sup>1</sup>, Sandra M. Durán<sup>2</sup>, Sandra M. Leal-Pinto<sup>2</sup>, Martha V. Roa-Cordero<sup>2</sup>, Jose D. Vargas<sup>2</sup>, Laura V. Herrera<sup>3</sup>, Alvaro Muñoz-Castro<sup>4</sup>, Desmond MacLeod-Carey<sup>5</sup>, Tonny W. Naranjo<sup>6,7</sup>, Peter L. Rodríguez-Kessler,<sup>8</sup> John J. Hurtado<sup>1\*</sup>

<sup>1</sup>Grupo de investigación en Química Inorgánica, Catálisis y Bioinorgánica, Departamento de Química, Universidad de los Andes, Carrera 1 No. 18A-12, 111711, Bogotá-Colombia; ra.murcia@uniandes.edu.co; jj.hurtado@uniandes.edu.co

<sup>2</sup>Universidad de Santander, Facultad de Ciencias Médicas y de la Salud, Calle 70 No. 55-210, Bucaramanga-Colombia; sandramduranbarajas@gmail.com sa.leal@mail.udes.edu.co; ma.roa@mail.udes.edu.co; vargasjosedavid.7.3@gmail.com

<sup>3</sup>Grupo Sistema Estomatognático y Morfofisiología (SEMF). Departamento de Ciencias Básicas, Universidad Santo Tomás seccional Bucaramanga, cra 27 No. 180-395, Bucaramanga-Colombia; laura.herrera01@ustabuca.edu.co

<sup>4</sup>Facultad de Ingeniería, Arquitectura y Diseño, Universidad San Sebastián, Bellavista 7, Santiago, 8420524 Chile; alvaro.munozc@uss.cl

<sup>5</sup>Universidad Autónoma de Chile, Facultad de Ingeniería, Instituto de Ciencias Químicas Aplicadas, Inorganic Chemistry and Molecular Materials Center, El Llano Subercaseaux 2801, Santiago, Chile; desmond.macleod@uautonoma.cl

<sup>6</sup> Corporación para Investigaciones Biológicas (CIB), Experimental and Medical Micology Group, Medellín 050010, Colombia; tnaranjo@cib.org.co

<sup>7</sup> Universidad Pontificia Bolivariana, Facultad de Medicina, Medellín 050034, Colombia; tnaranjo@cib.org.co

<sup>8</sup>Centro de Investigaciones en Óptica A.C., Loma del Bosque 115, Col. Lomas del Campestre, León, Guanajuato, 37150, México; plkessler@cio.mx

\* Correspondence: jj.hurtado@uniandes.edu.co; Tel.: +57-1-3394949 (ext. 3468), ORCID: <https://orcid.org/0000-0002-0511-9719>

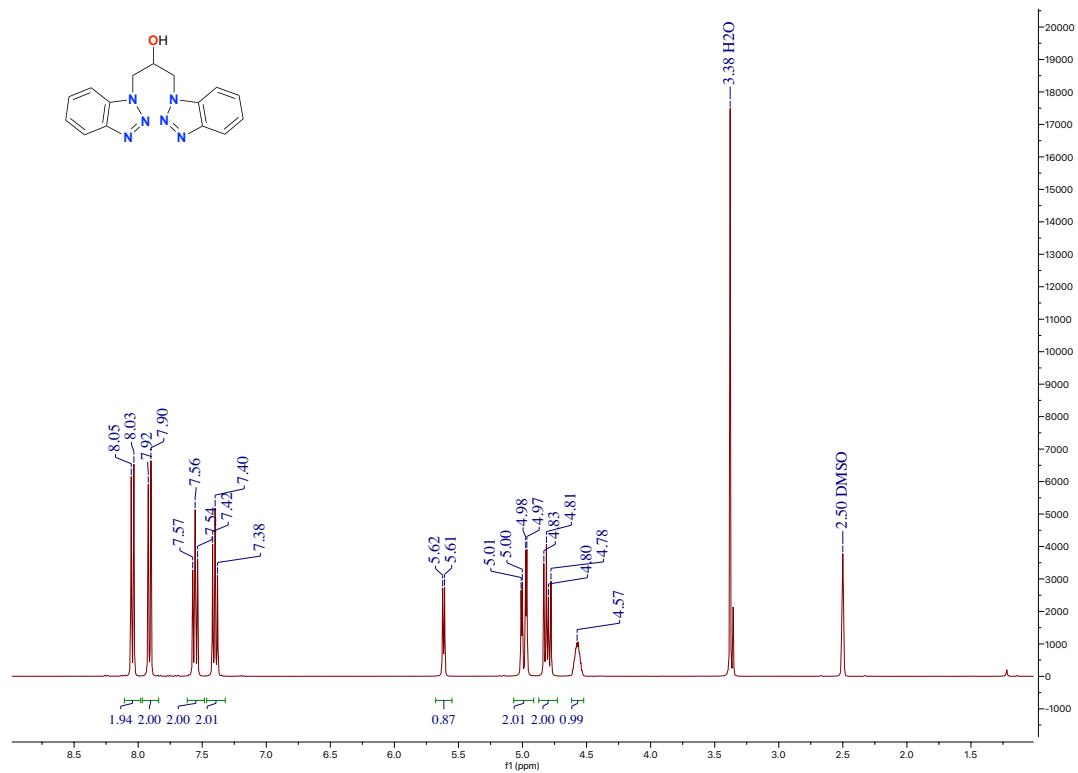

**Figure S1.**  $^1\text{H}$  NMR spectrum of 1,3-bis(benzotriazole-1-yl)propan-2-ol (**1**) in  $\text{DMSO-d}_6$

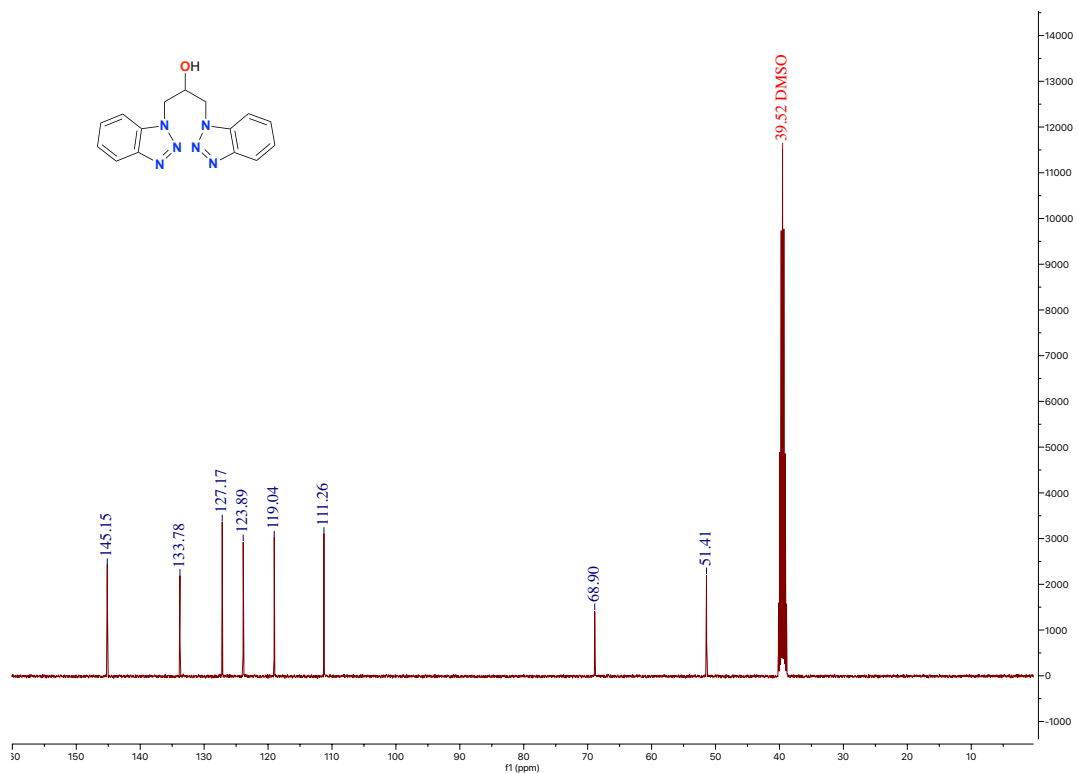

**Figure S2.**  $^{13}\text{C}$  NMR spectrum of 1,3-bis(benzotriazole-1-yl)propan-2-ol (**1**) in  $\text{DMSO-d}_6$

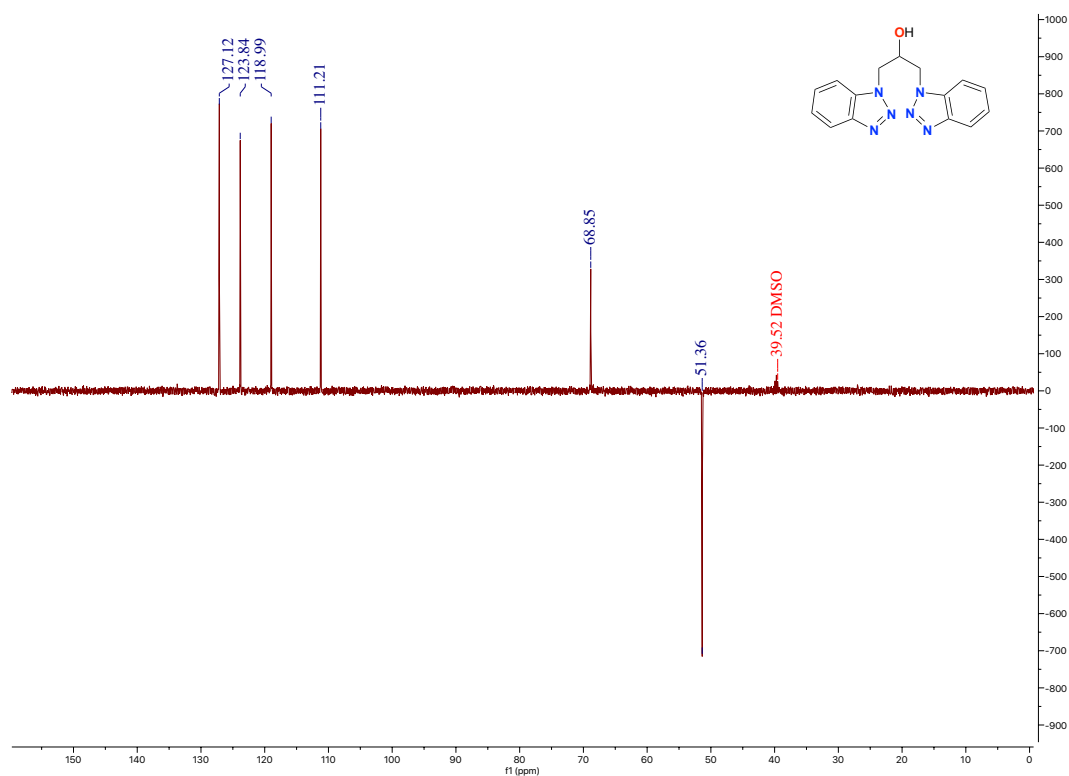

**Figure S3.** DEPT NMR spectrum of 1,3-bis(benzotriazole-1-yl)propan-2-ol (**1**) in DMSO-d<sub>6</sub>

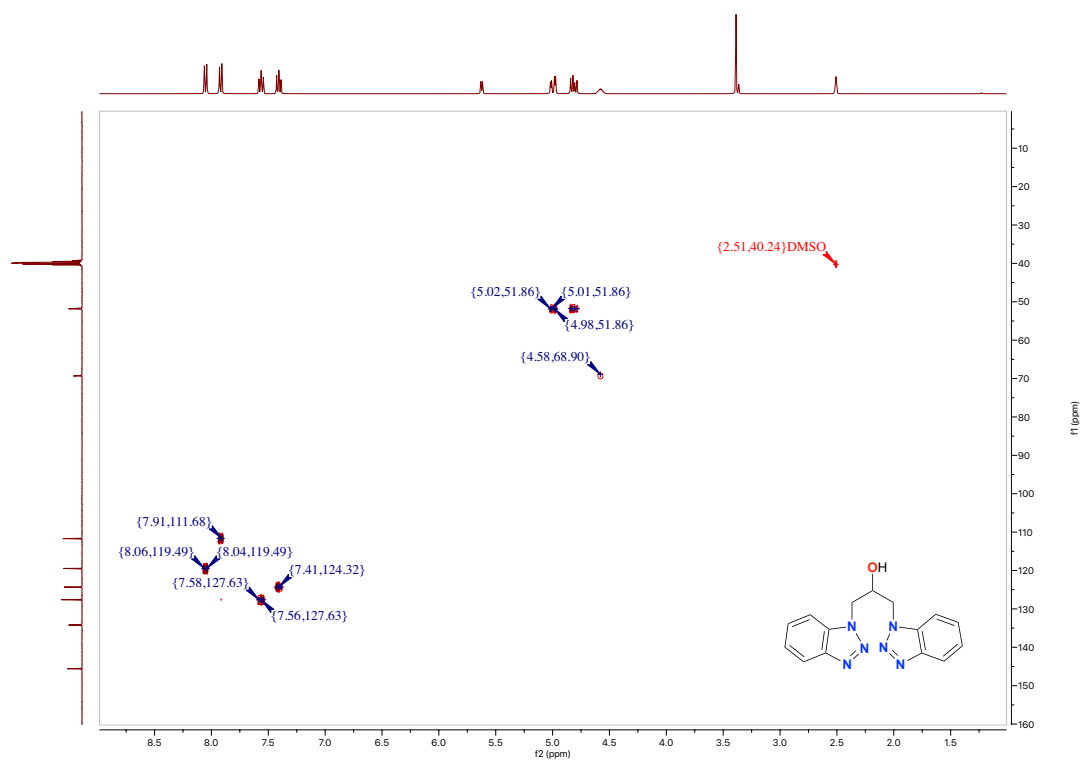

**Figure S4.** HSQC NMR spectrum of 1,3-bis(benzotriazole-1-yl)propan-2-ol (**1**) in DMSO-d<sub>6</sub>

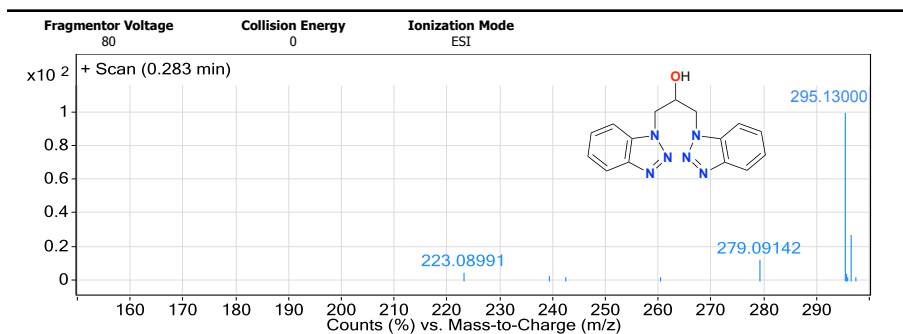

**Figure S5.** MS spectrum of 1,3-bis(benzotriazole-1-yl)propan-2-ol (**1**)

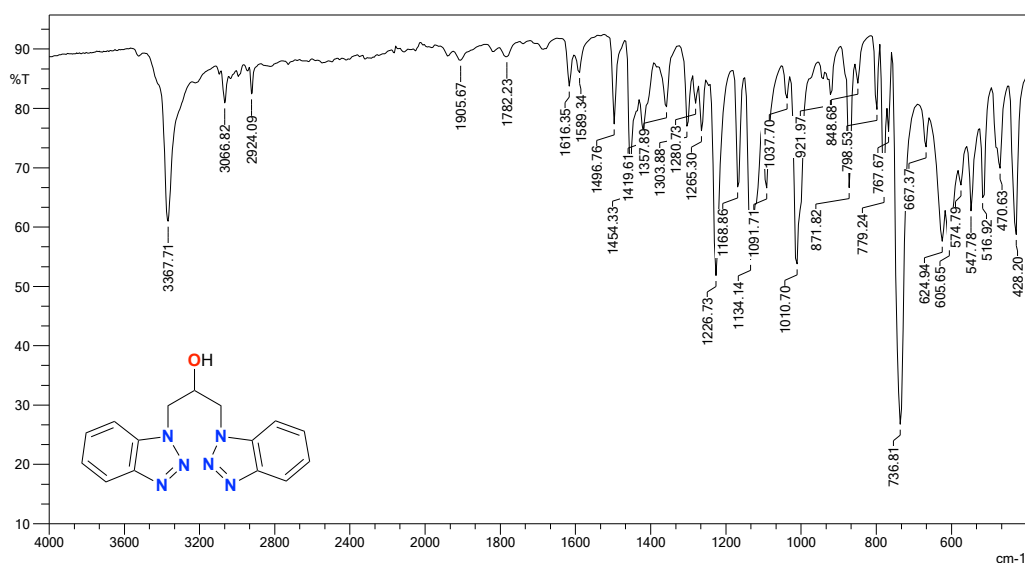

**Figure S6.** FT-IR (ATR) spectrum of 1,3-bis(benzotriazole-1-yl)propan-2-ol (**1**)

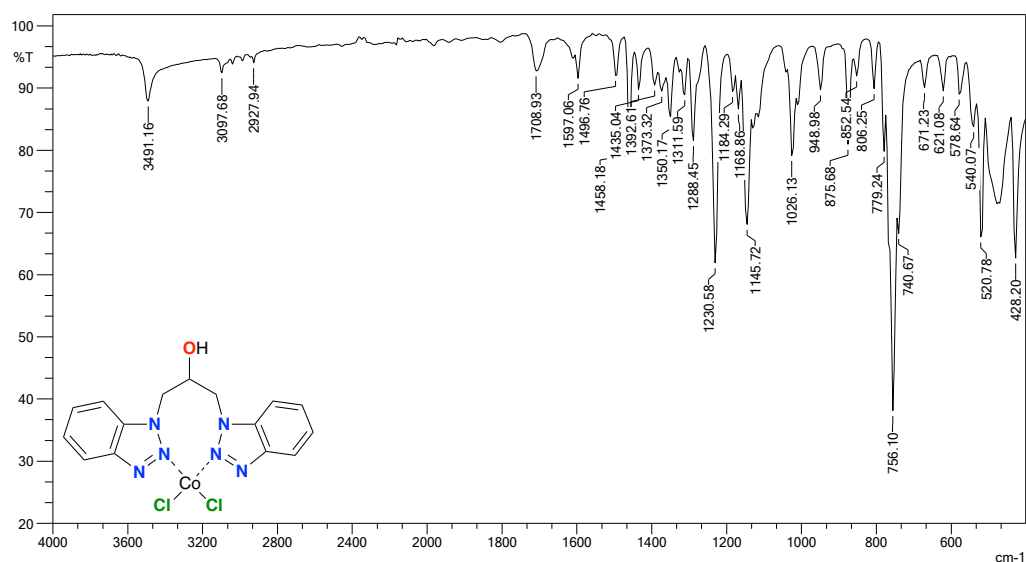

**Figure S7.** FT-IR (ATR) spectrum of dichloro[1,3-bis(benzotriazole-1-yl)propan-2-ol-N,N']cobalt(II) (**2**)

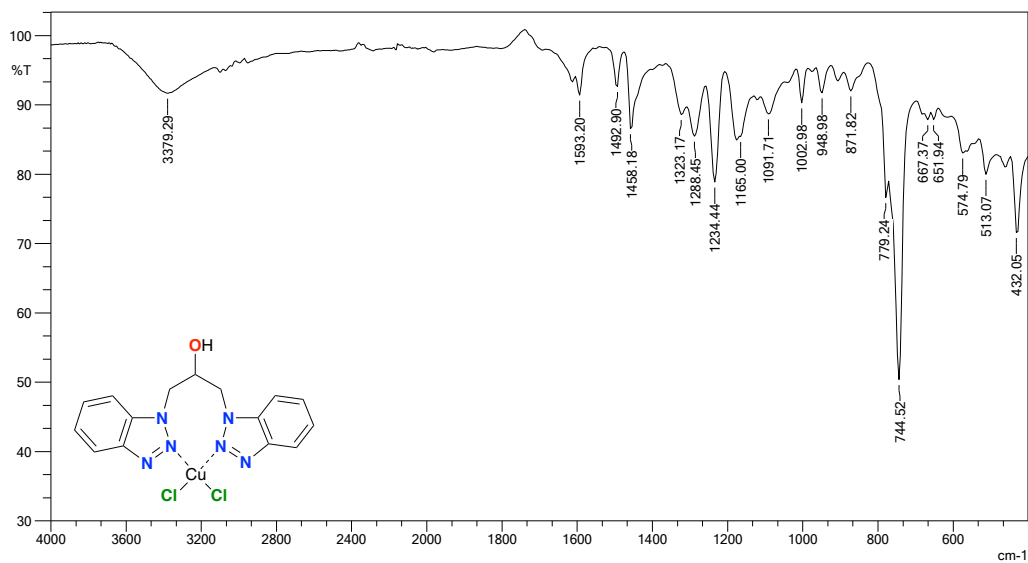

**Figure S8.** FT-IR (ATR) spectrum of dichloro[1,3-bis(benzotriazole-1-yl)propan-2-ol-N,N']copper(II) (**3**)

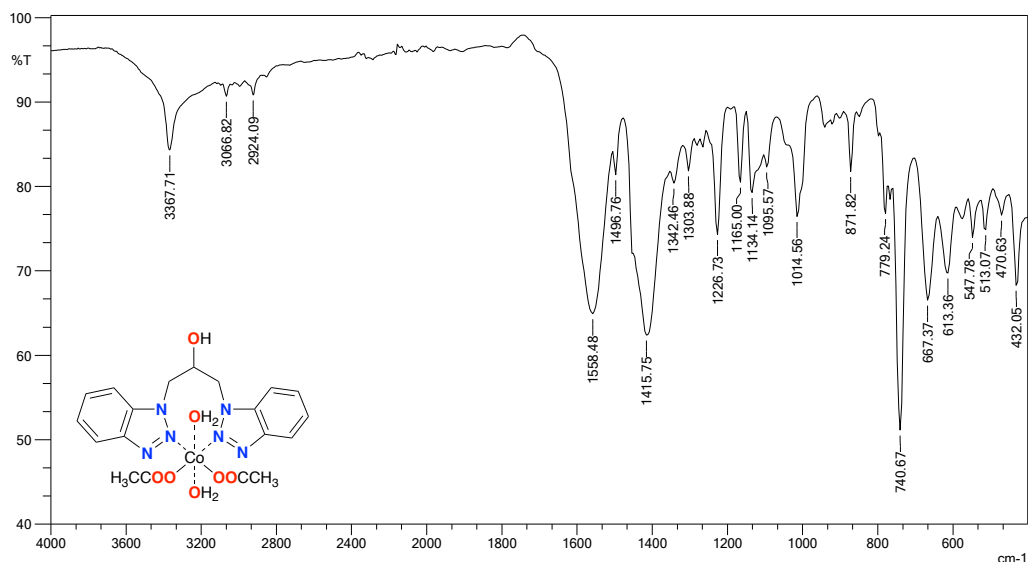

**Figure S9.** FT-IR (ATR) spectrum of diacetate-diaqua-[1,3-bis(benzotriazole-1-yl)propan-2-ol-N,N']cobalt(II) (**4**)

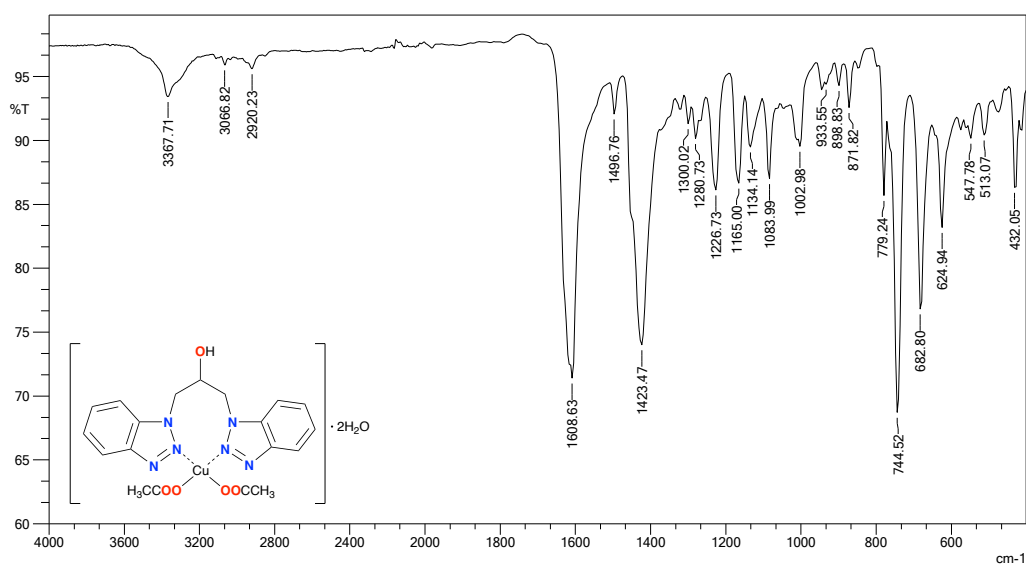

**Figure S10.** FT-IR (ATR) spectrum of diacetate[1,3-bis(benzotriazole-1-yl)propan-2-ol-N,N']copper(II) dihydrated (**5**)

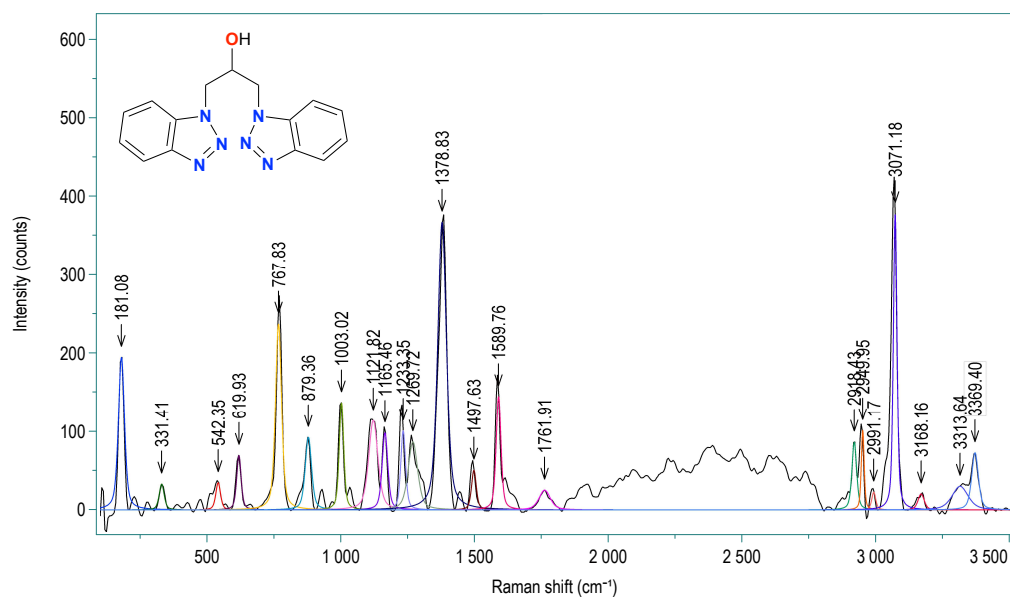

**Figure S11.** Raman spectrum of 1,3-bis(benzotriazole-1-yl)propan-2-ol (**1**)

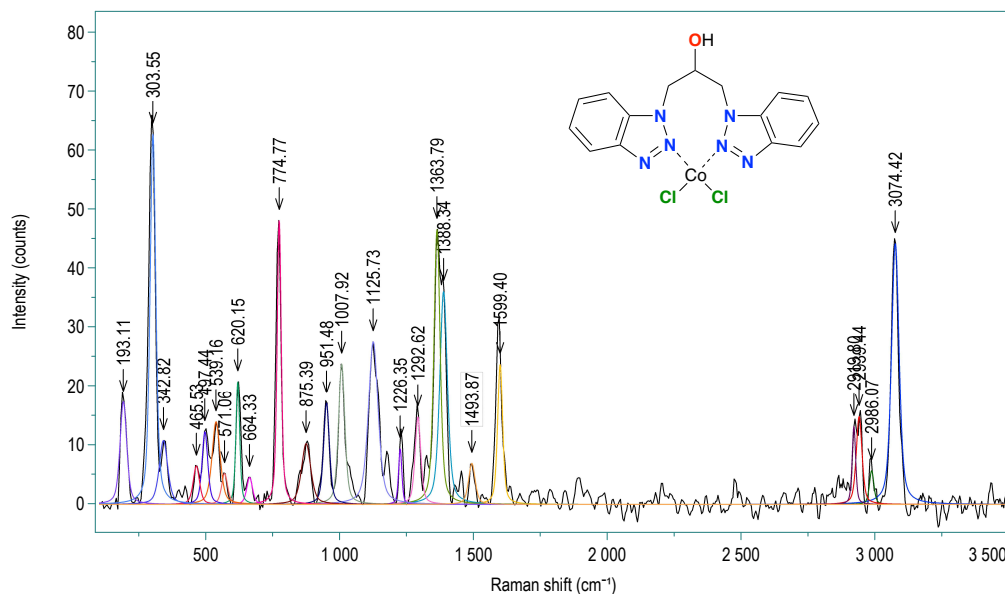

**Figure S12.** Raman spectrum of dichloro[1,3-bis(benzotriazole-1-yl)propan-2-ol-N,N']cobalt(II) (2)

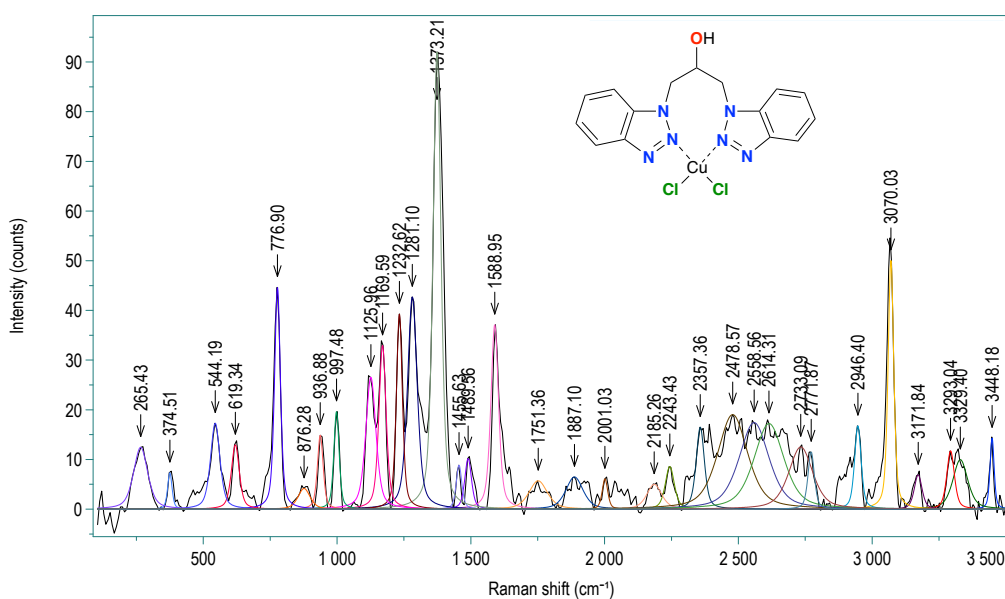

**Figure S13.** Raman spectrum of dichloro[1,3-bis(benzotriazole-1-yl)propan-2-ol-N,N']copper(II) (3)

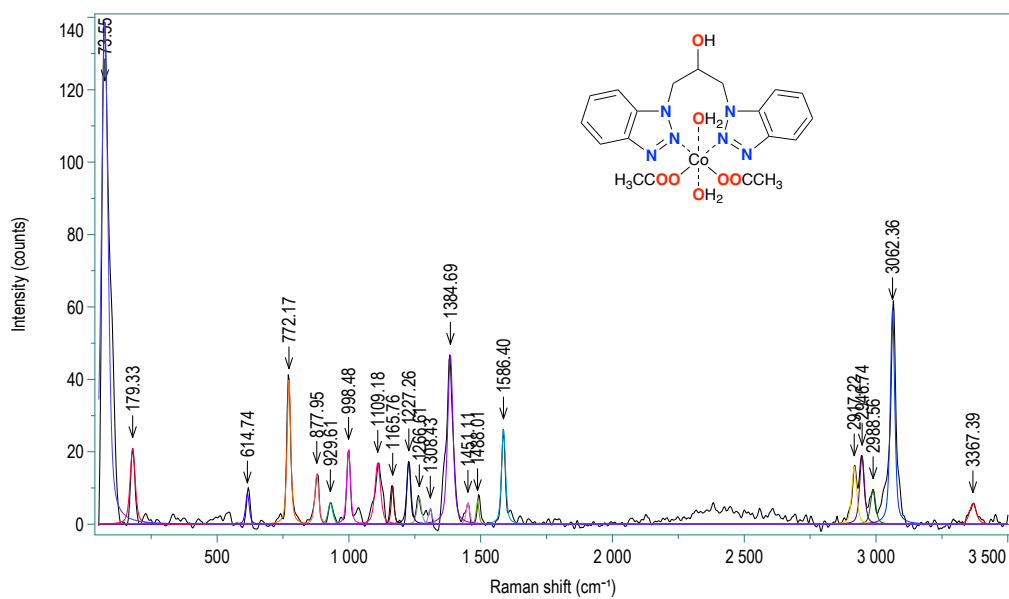

**Figure S14.** Raman spectrum of diacetate-diaqua-[1,3-bis(benzotriazole-1-yl)propan-2-ol-N,N']cobalt(II) (4)

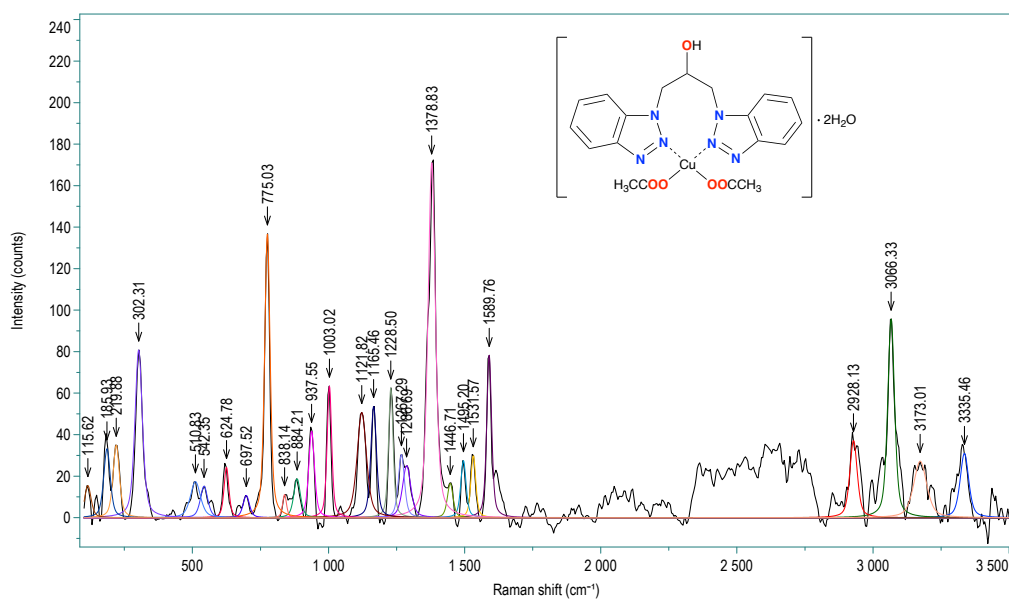

**Figure S15.** Raman spectrum of diacetate[1,3-bis(benzotriazole-1-yl)propan-2-ol-N,N']copper(II) dihydrated (5)



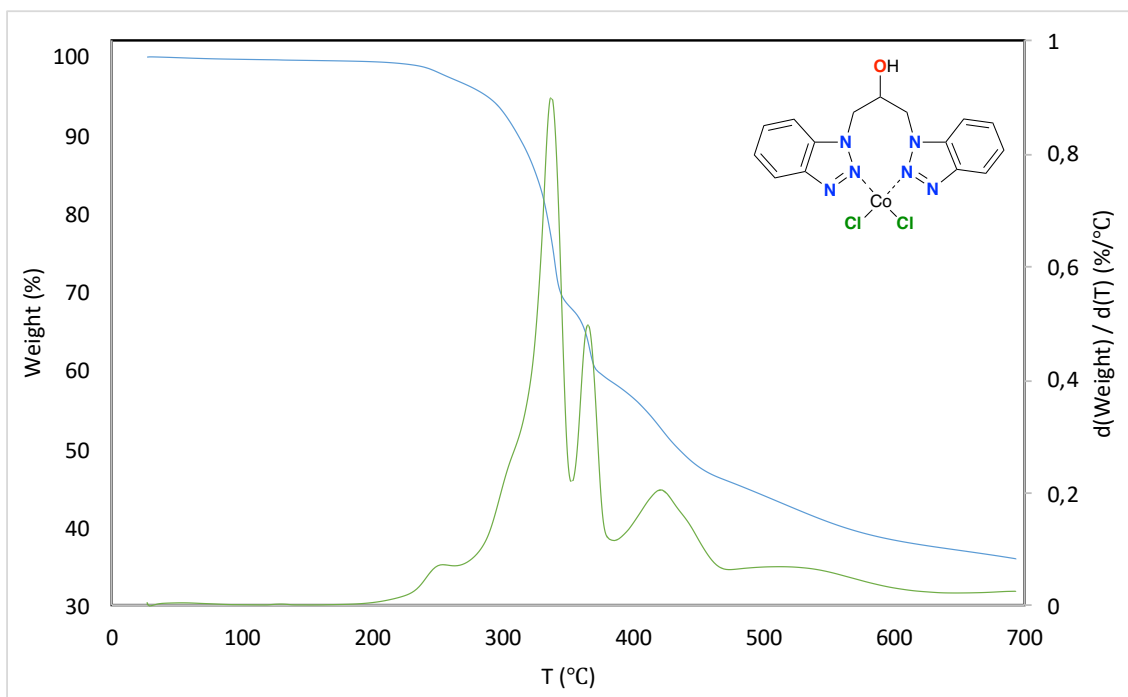

**Figure S16.** Thermogravimetric (TG) analysis and derivative thermogravimetric (DTG) of dichloro[1,3-bis(benzotriazole-1-yl)propan-2-ol-N,N']cobalt(II) (**2**) in nitrogen atmosphere

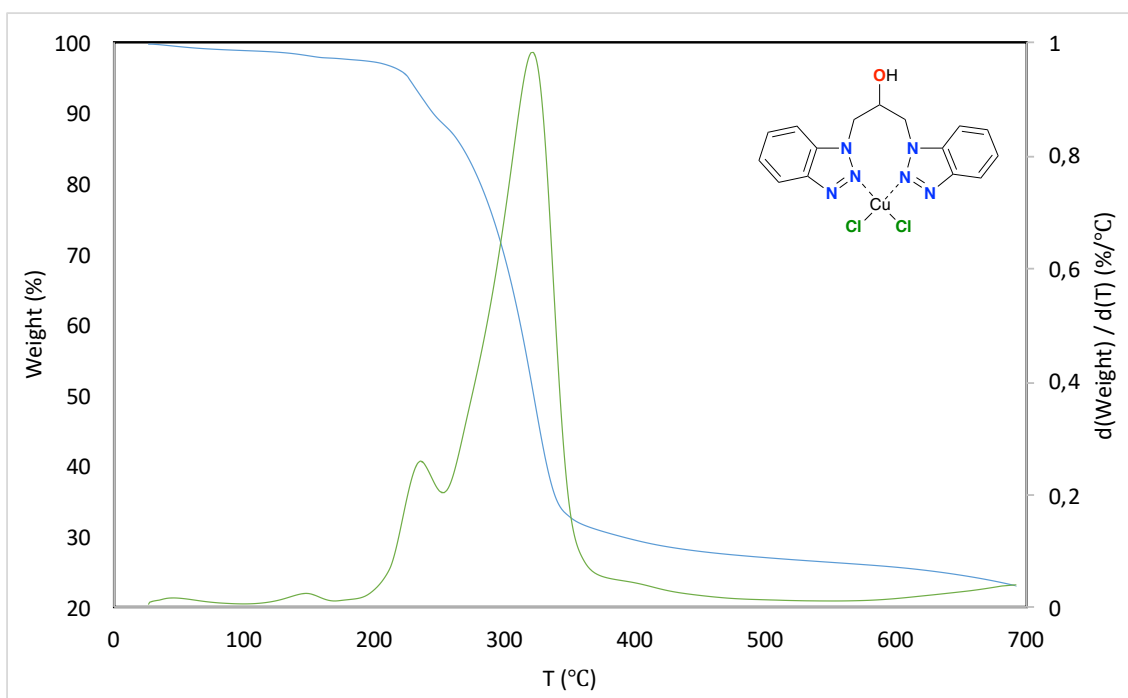

**Figure S17.** Thermogravimetric (TG) analysis and derivative thermogravimetric (DTG) of dichloro[1,3-bis(benzotriazole-1-yl)propan-2-ol-N,N']copper(II) (**3**) in nitrogen atmosphere

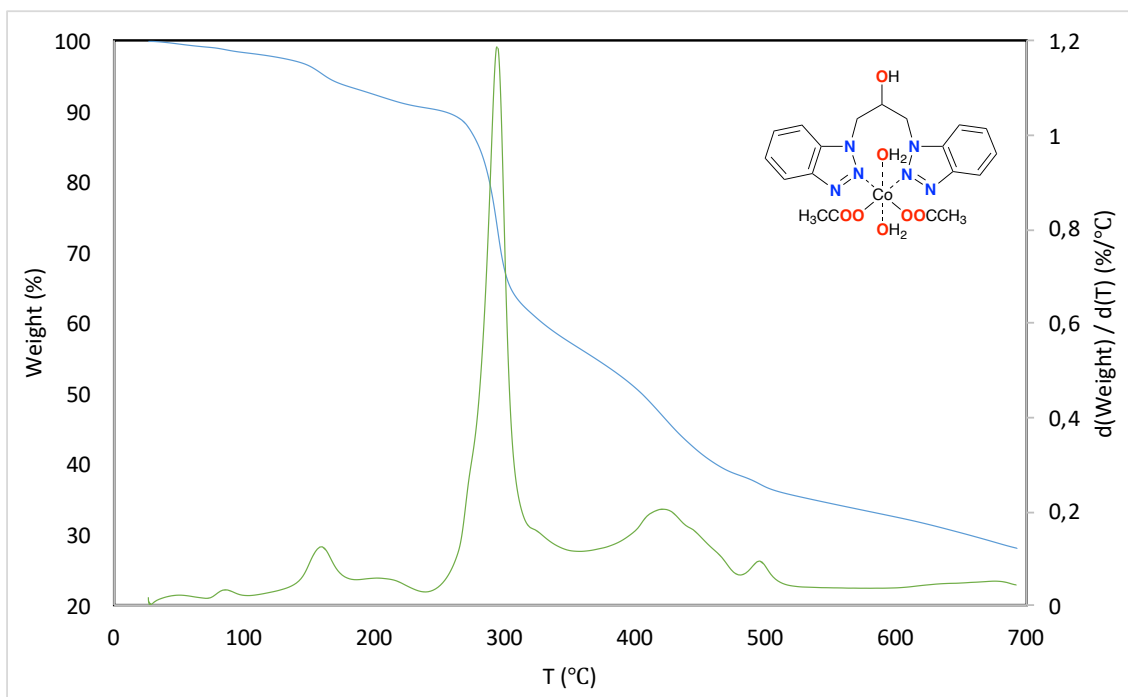

**Figure S18.** Thermogravimetric (TG) analysis and derivative thermogravimetric (DTG) of diacetate-diaqua-[1,3-bis(benzotriazole-1-yl)propan-2-ol-N,N']cobalt(II) (4) in nitrogen atmosphere

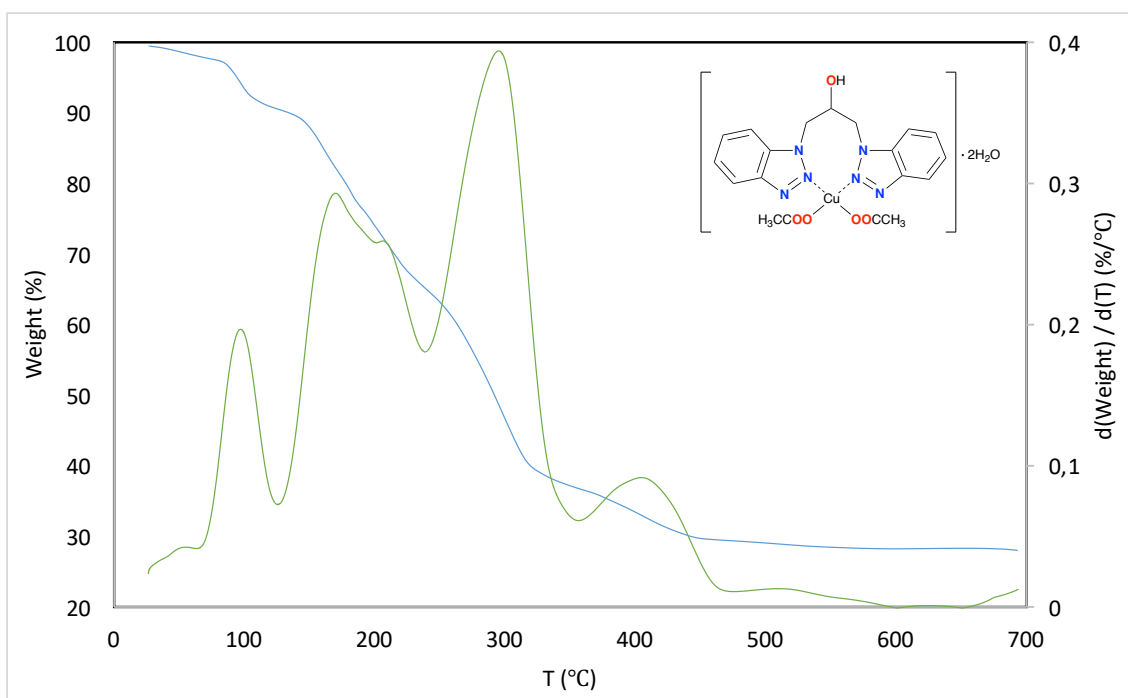

**Figure S19.** Thermogravimetric (TG) analysis and derivative thermogravimetric (DTG) of diacetate[1,3-bis(benzotriazole-1-yl)propan-2-ol-N,N']copper(II) dihydrated (5) in nitrogen atmosphere

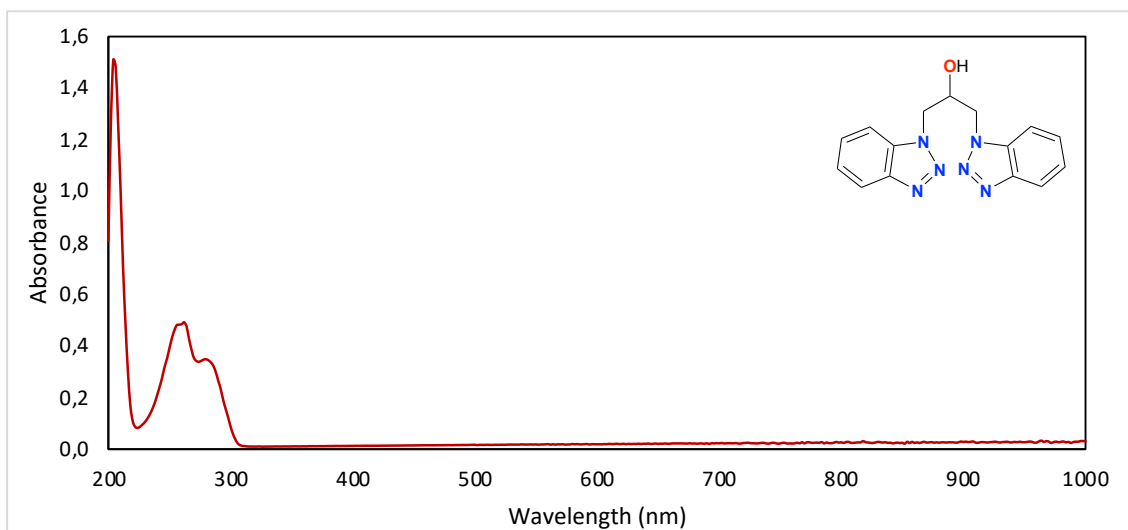

**Figure S20.** UV-Vis spectrum of 1,3-bis(benzotriazole-1-yl)propan-2-ol (**1**) in methanol.  $2.10 \times 10^{-5}$  M, 200-1000 nm region

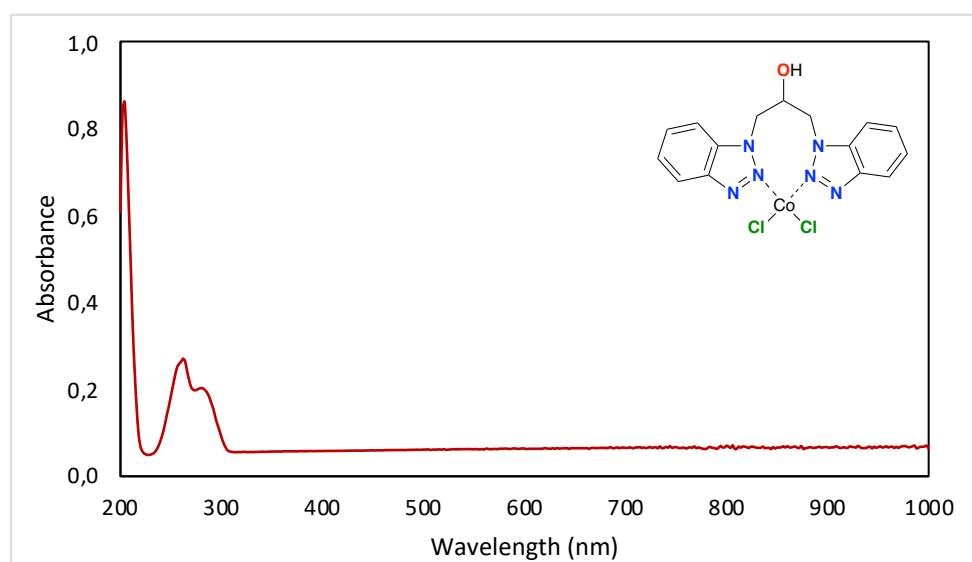

**Figure S21.** UV-Vis spectrum of dichloro[1,3-bis(benzotriazole-1-yl)propan-2-ol-N,N']cobalt(II) (**2**) in methanol.  $2.18 \times 10^{-5}$  M, 200-1000 nm region

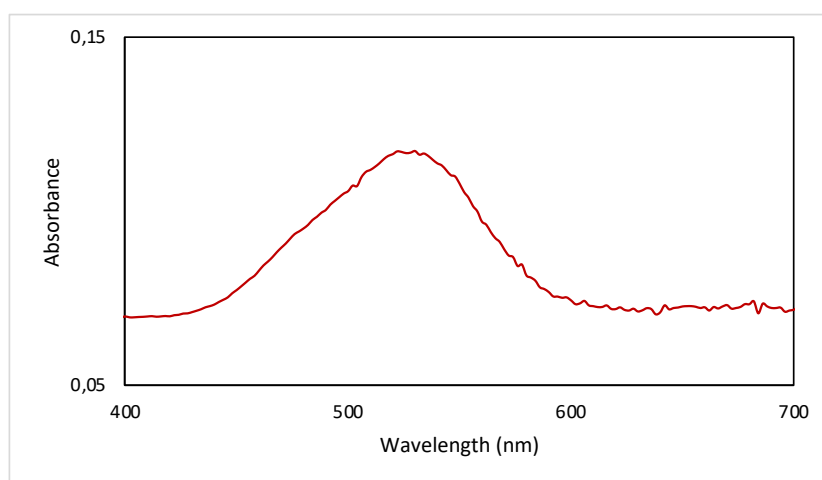

**Figure S22.** UV-Vis spectrum of dichloro[1,3-bis(benzotriazole-1-yl)propan-2-ol-N,N']cobalt(II) (**2**) in methanol.  $4.72 \times 10^{-3}$  M, 400-700 nm region

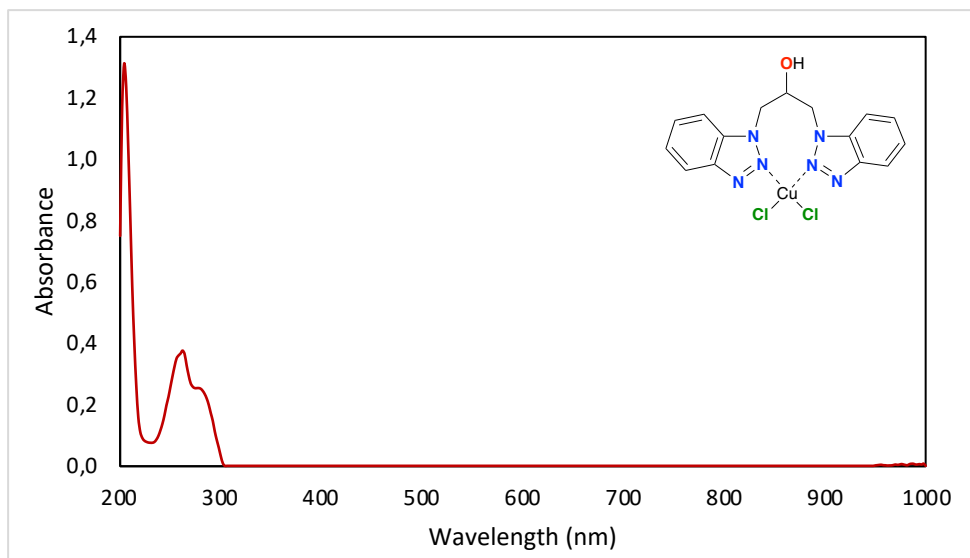

**Figure S23.** UV-Vis spectrum of dichloro[1,3-bis(benzotriazole-1-yl)propan-2-ol-N,N']copper(II) (**3**) in methanol.  $2.16 \times 10^{-5}$  M, 200-1000 nm region

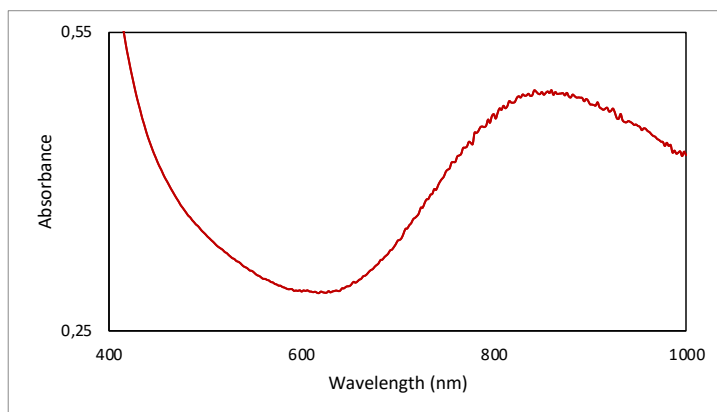

**Figure S24.** UV-Vis spectrum of dichloro[1,3-bis(benzotriazole-1-yl)propan-2-ol-N,N']copper(II) (**3**) in methanol.  $4.66 \times 10^{-3}$  M, 400-1000 nm region

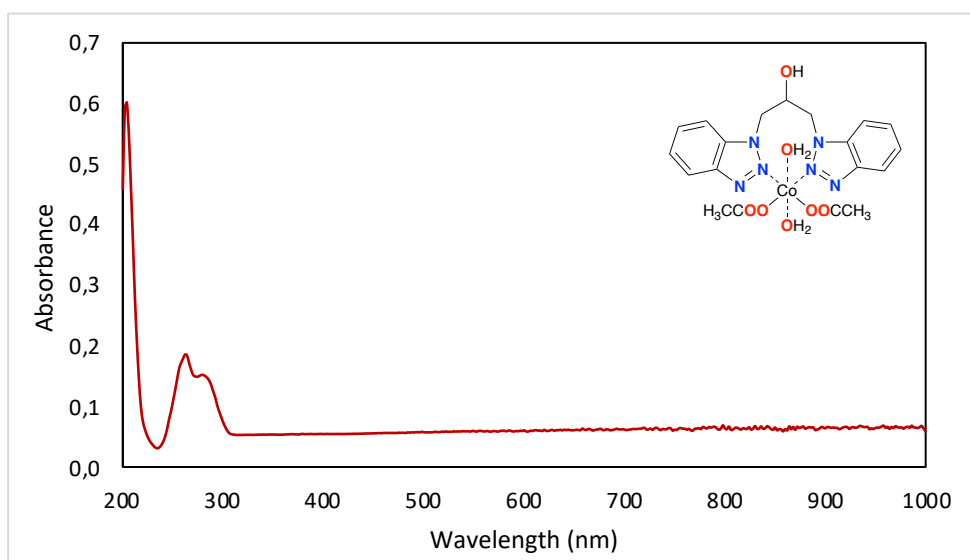

**Figure S25.** UV-Vis spectrum of diacetate-diaqua-[1,3-bis(benzotriazole-1-yl)propan-2-ol-N,N']cobalt(II) (**4**) in methanol.  $1.82 \times 10^{-5}$  M, 200-1000 nm region

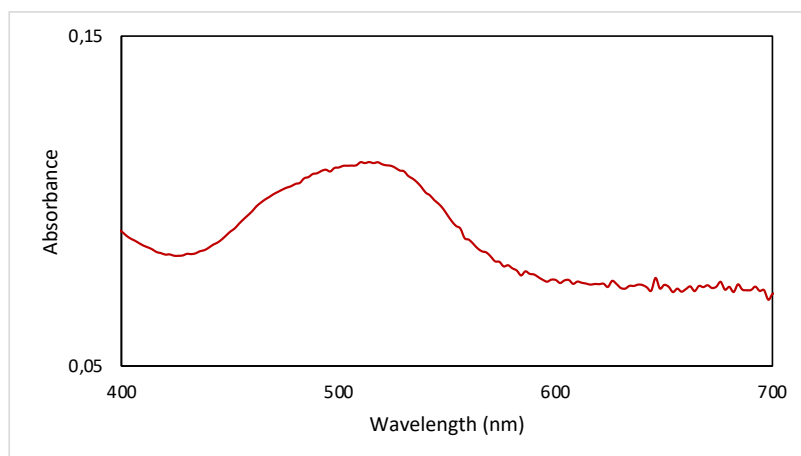

**Figure S26.** UV-Vis spectrum of diacetate-diaqua-[1,3-bis(benzotriazole-1-yl)propan-2-ol-N,N']cobalt(II) (**4**) in methanol.  $3.94 \times 10^{-3}$  M, 400-700 nm region

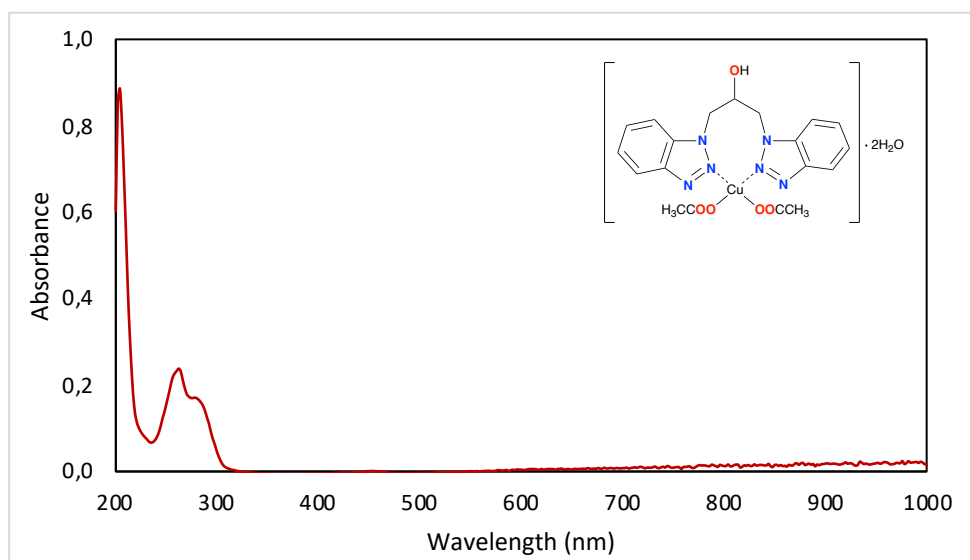

**Figure S27.** UV-Vis spectrum of diacetate[1,3-bis(benzotriazole-1-yl)propan-2-ol-N,N']copper(II) dihydrated (**5**) in methanol.  $1.81 \times 10^{-5}$  M, 200-1000 nm region

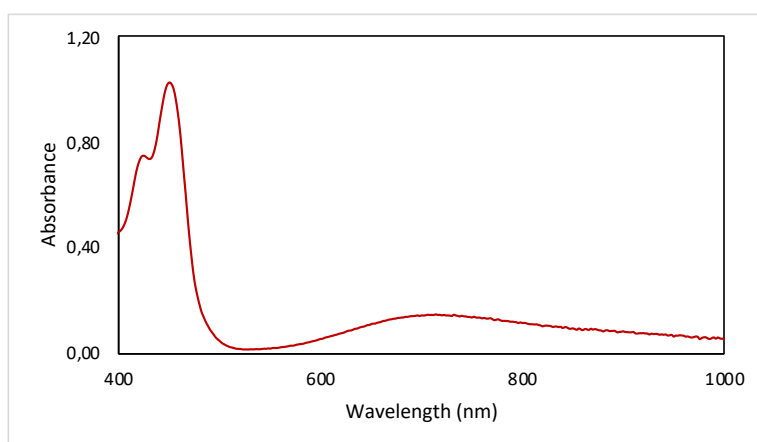

**Figure S28.** UV-Vis spectrum of diacetate[1,3-bis(benzotriazole-1-yl)propan-2-ol-N,N']copper(II) dihydrated (**5**) in methanol.  $3.91 \times 10^{-3}$  M, 400-1000 nm region

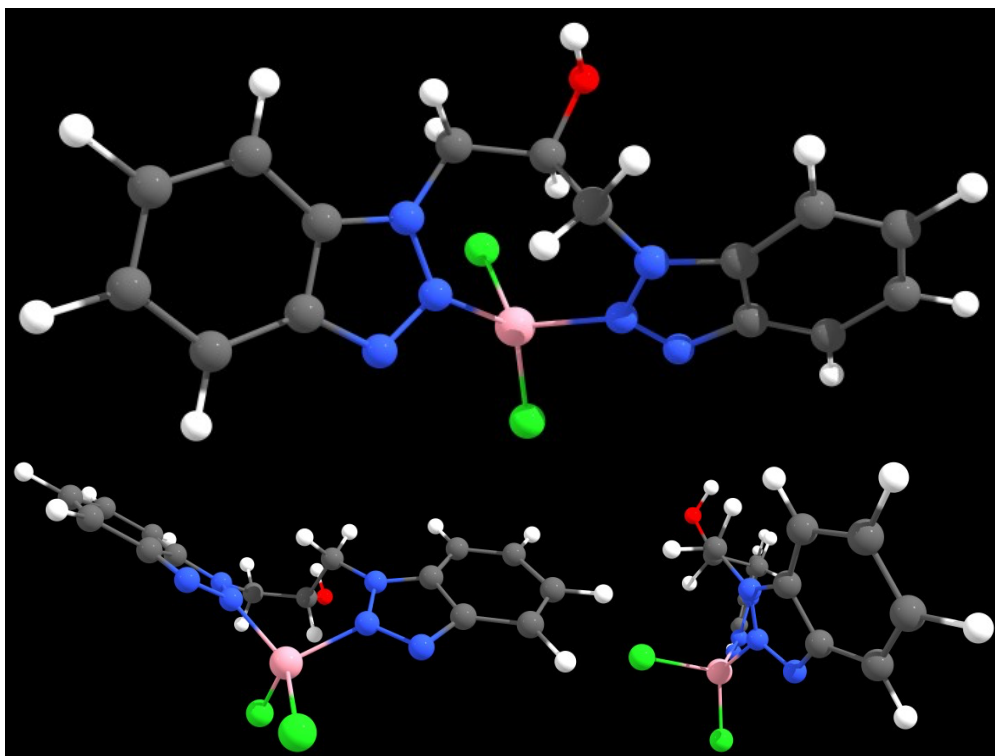

**Figure S29.** Optimized geometry of conformer Da of (2) – Different perspectives

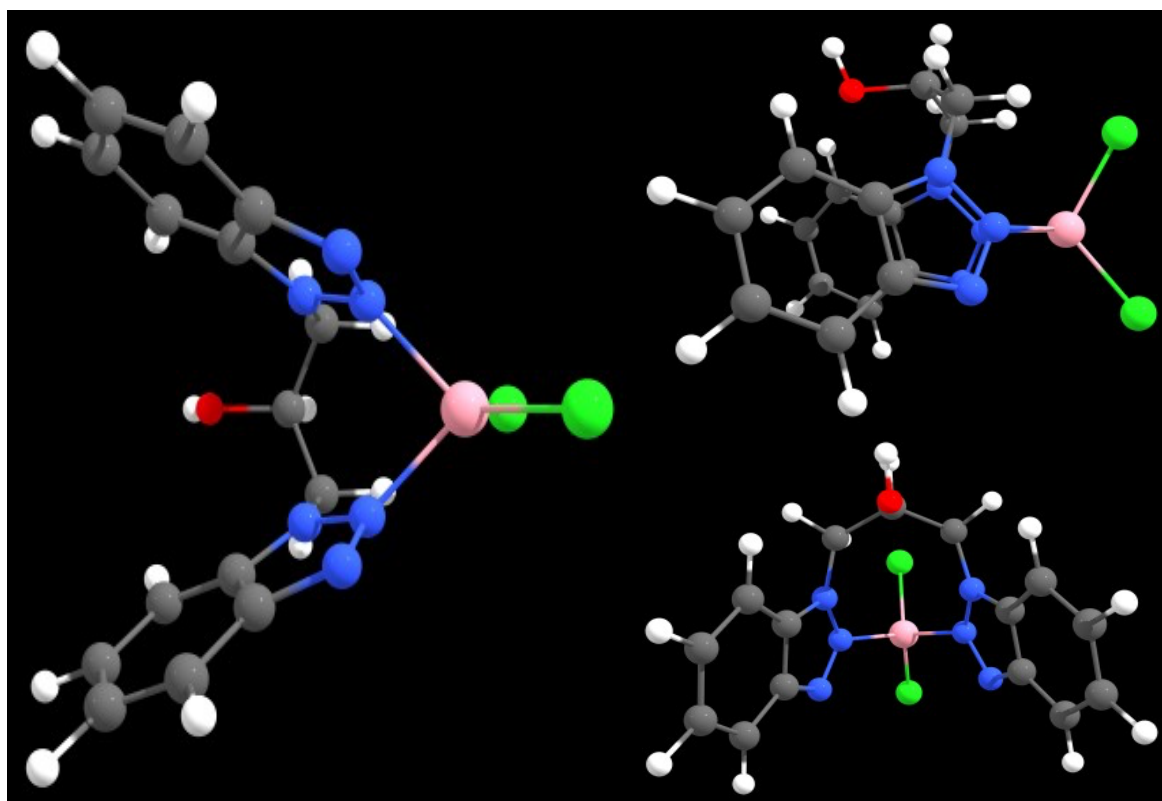

**Figure S30.** Optimized geometry of conformer Db of (2) – Different perspectives

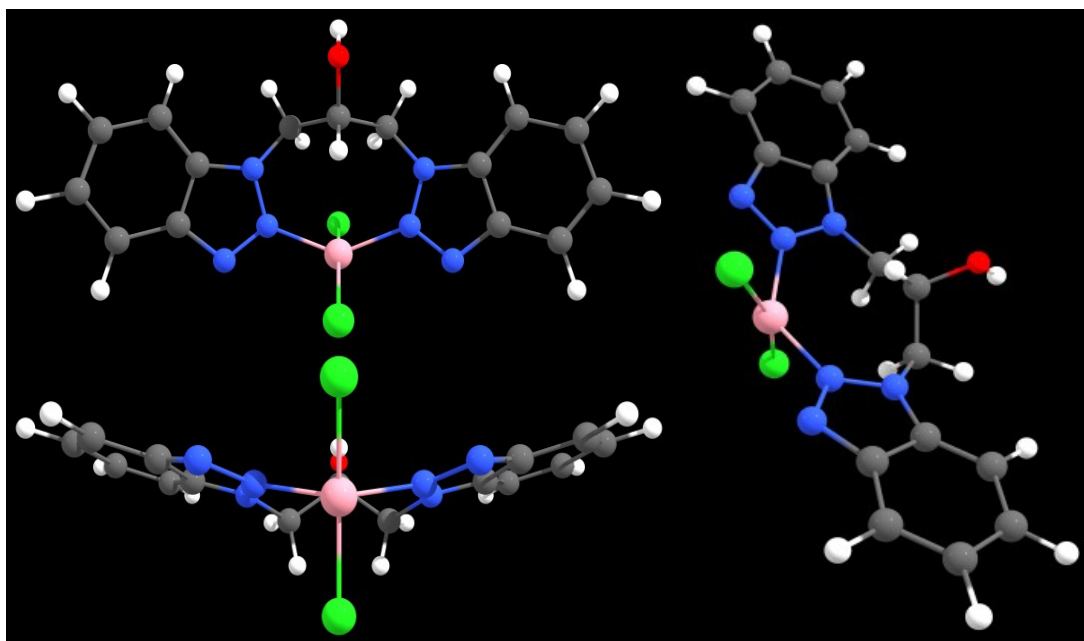

**Figure S31.** Optimized geometry of conformer Dc of (2) – Different perspectives

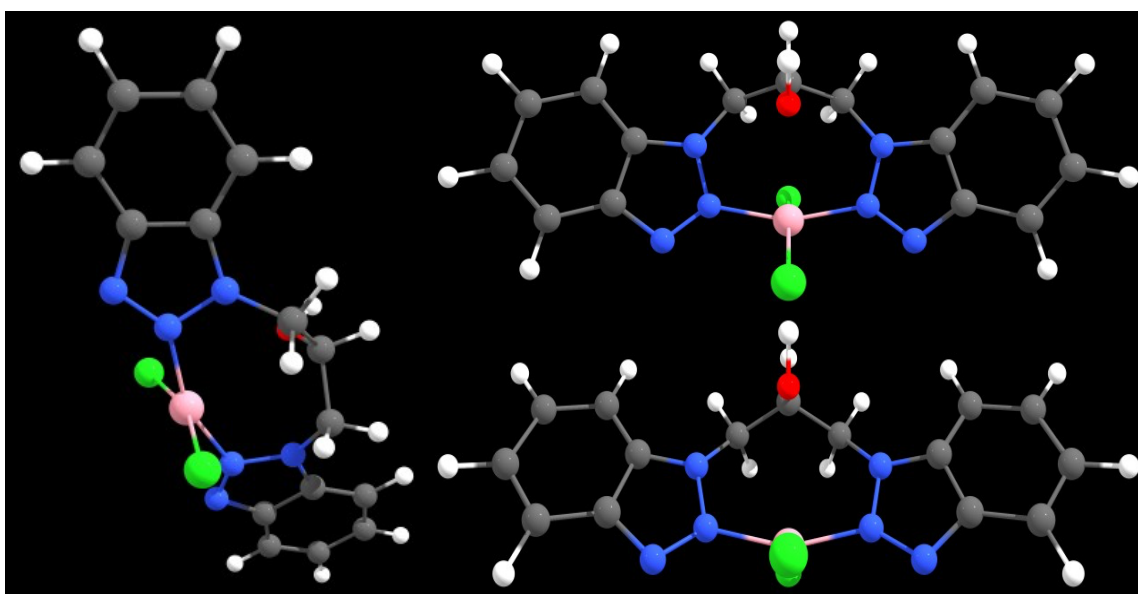

**Figure S32.** Optimized geometry of conformer Dd of (2) – Different perspectives

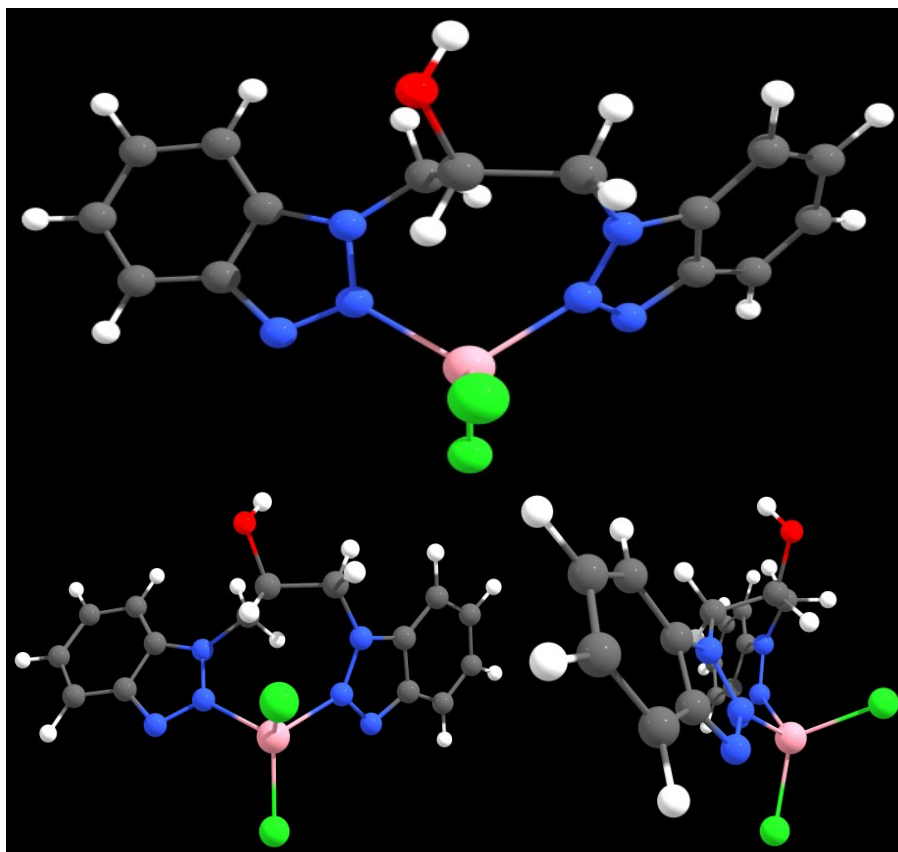

**Figure S33.** Optimized geometry of conformer Qa of (2) – Different perspectives

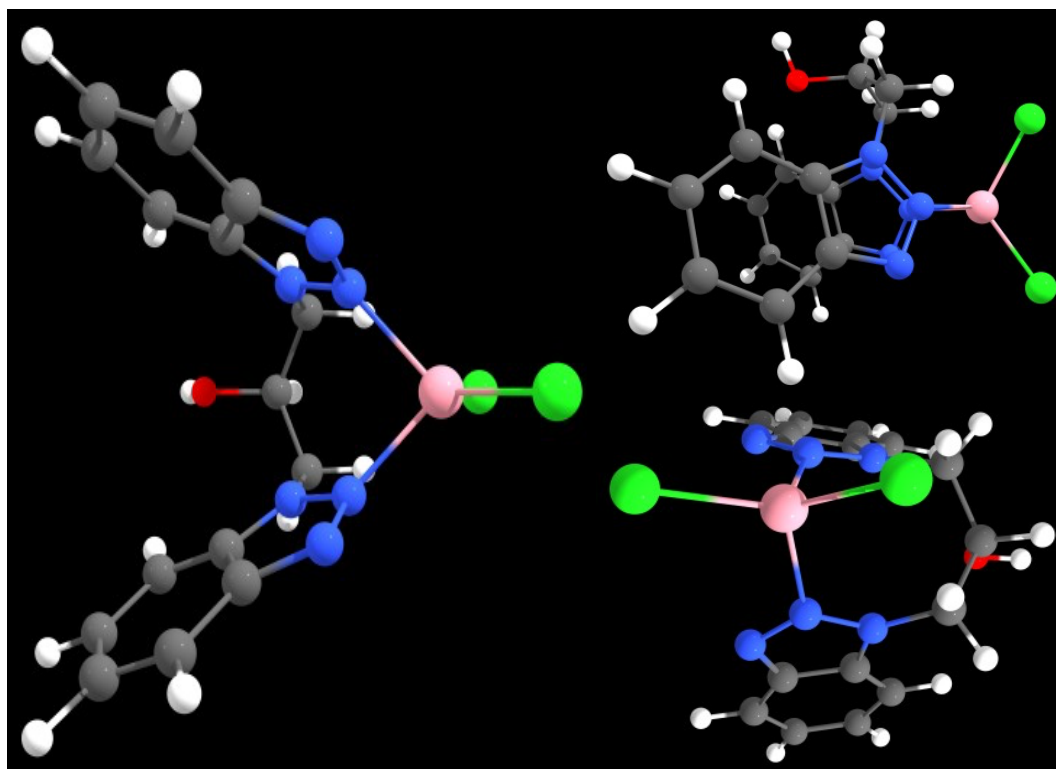

**Figure S34.** Optimized geometry of conformer Qb of (2) – Different perspectives



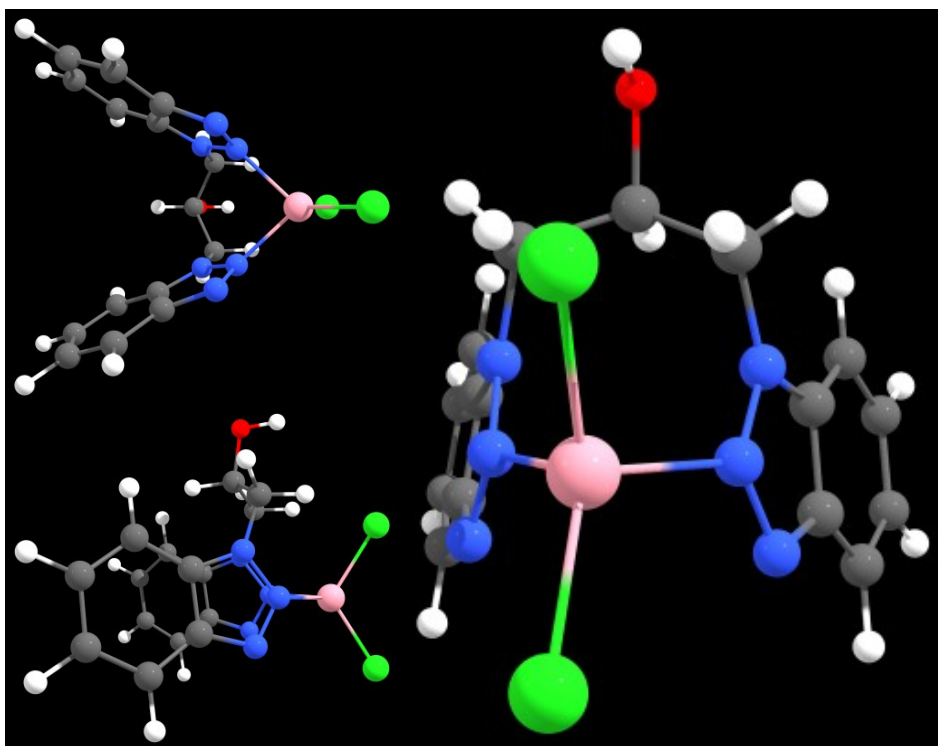

**Figure S35.** Optimized geometry of conformer Qc of (2) – Different perspectives

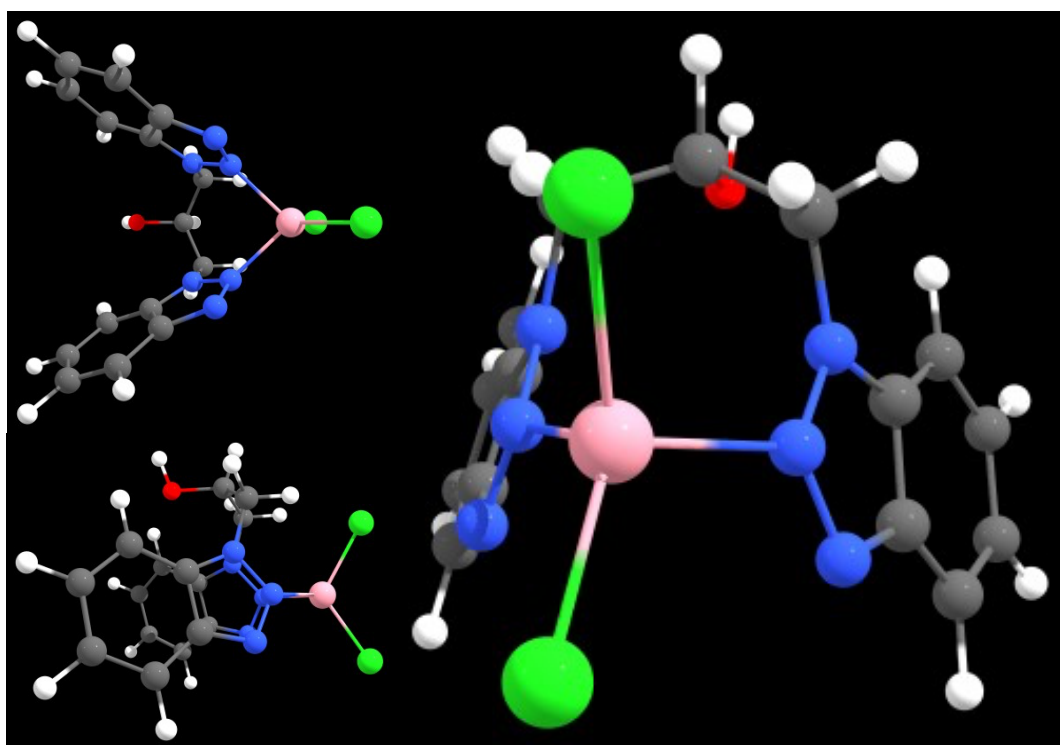

**Figure S36.** Optimized geometry of conformer Qd of (2) – Different perspectives

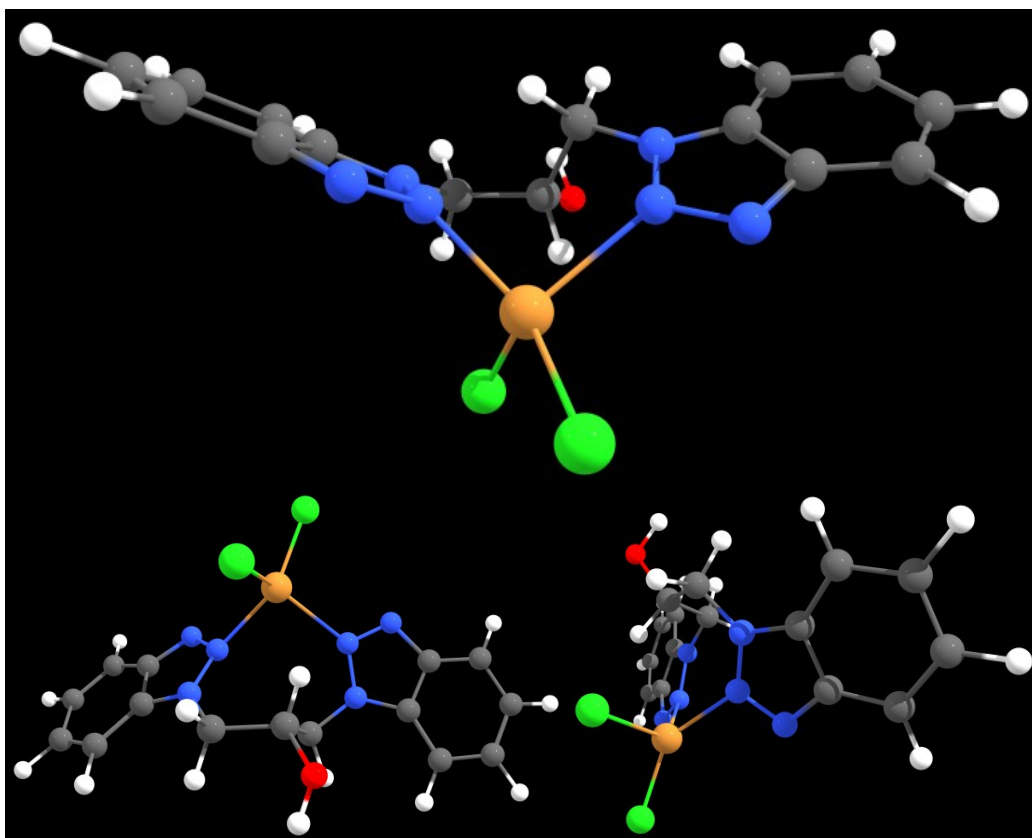

**Figure S37.** Optimized geometry of conformer Da of (3) – Different perspectives

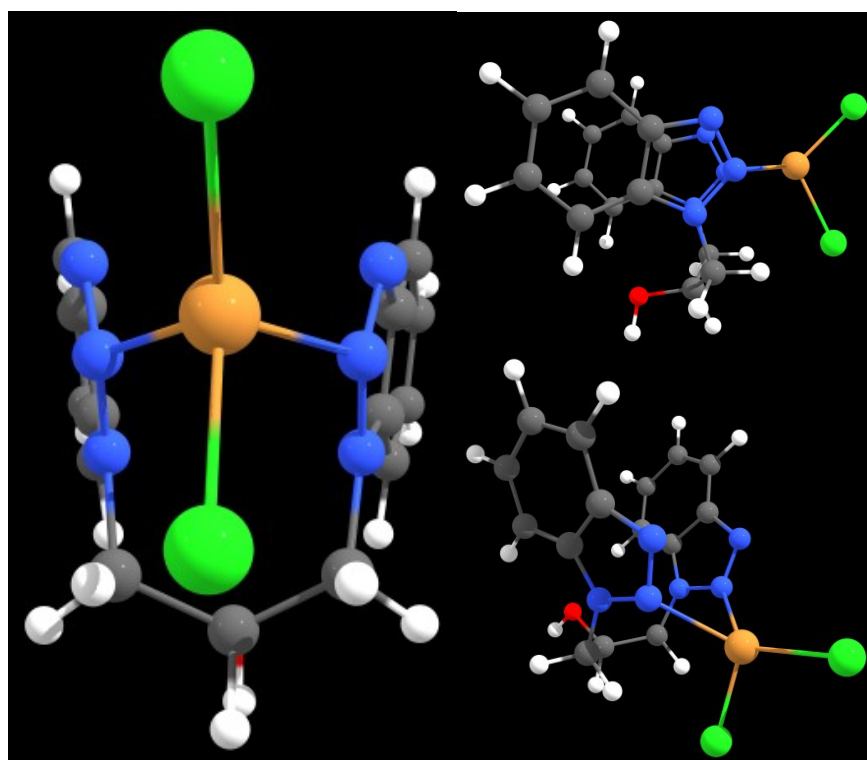

**Figure S38.** Optimized geometry of conformer Db of (3) – Different perspectives

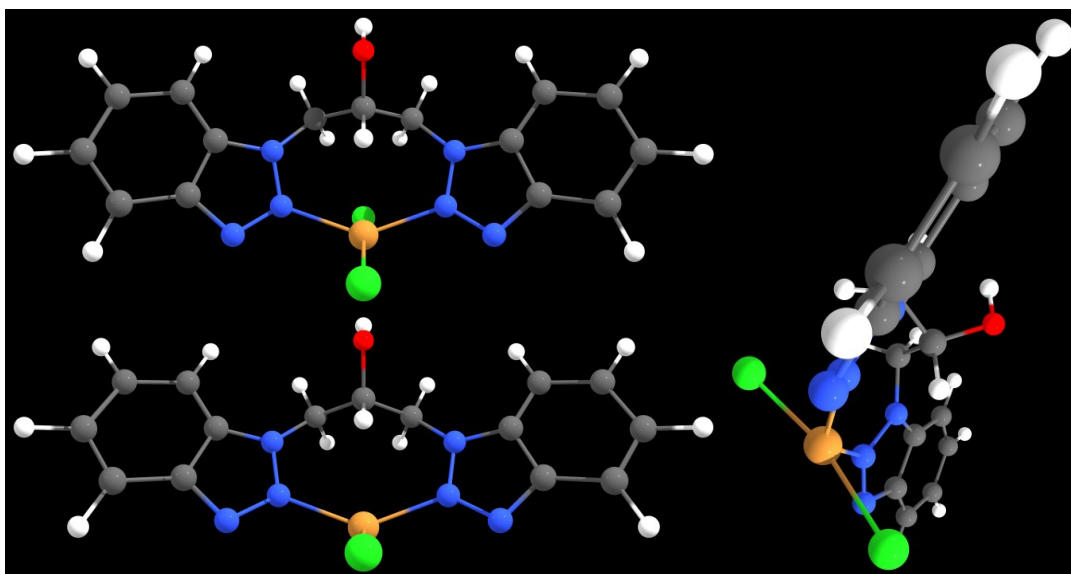

**Figure S39.** Optimized geometry of conformer Dc of (3) – Different perspectives

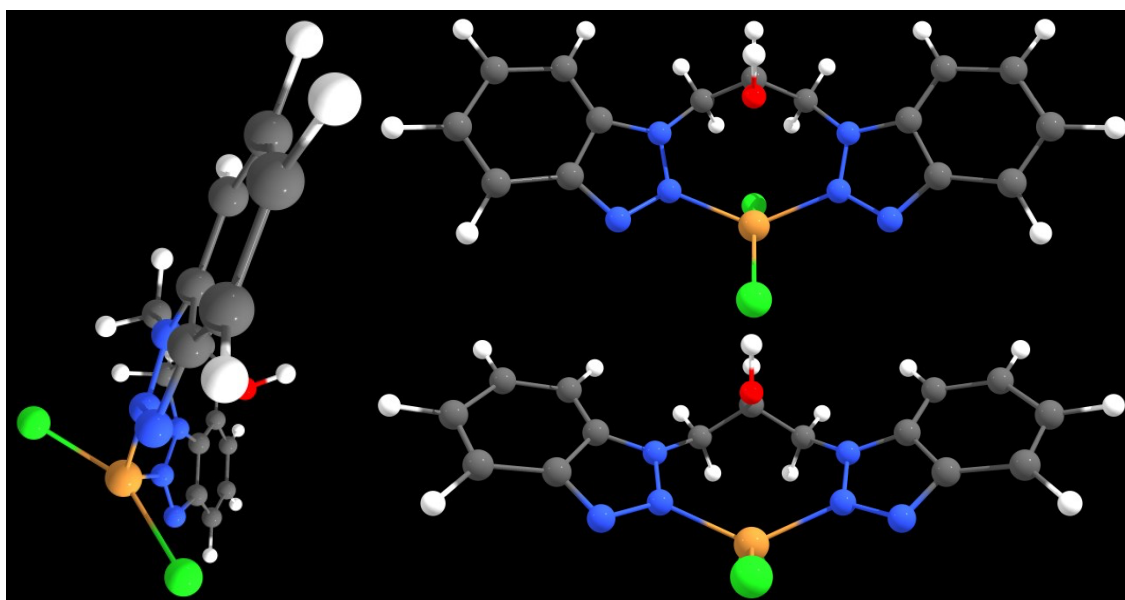

**Figure S40.** Optimized geometry of conformer Dd of (3) – Different perspectives

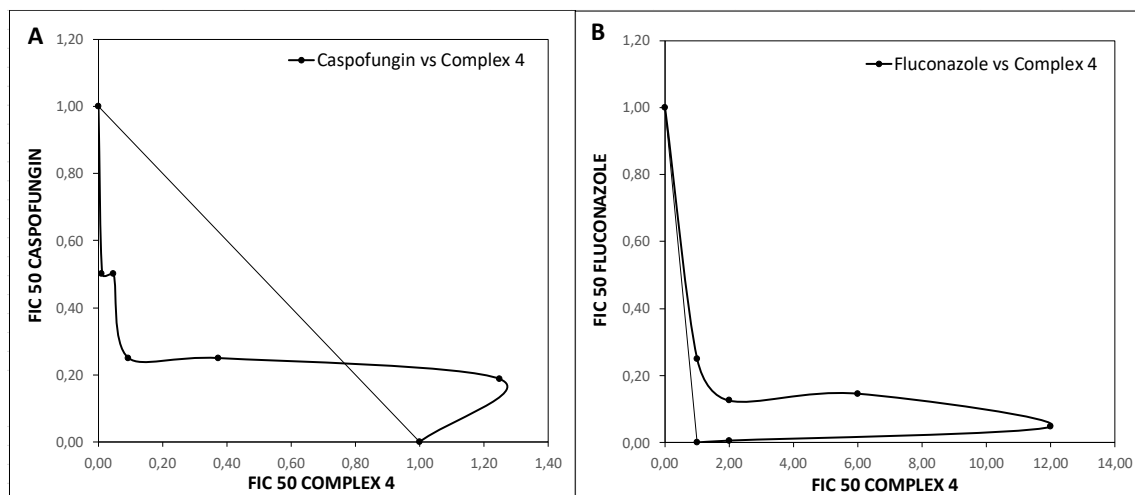

**Figure S41.** Drug interaction isobolograms. A: A (Caspofungin vs Complex 4 against *C. tropicalis* 66029) B (Fluconazole vs Complex 4 *C. albicans* 90028).

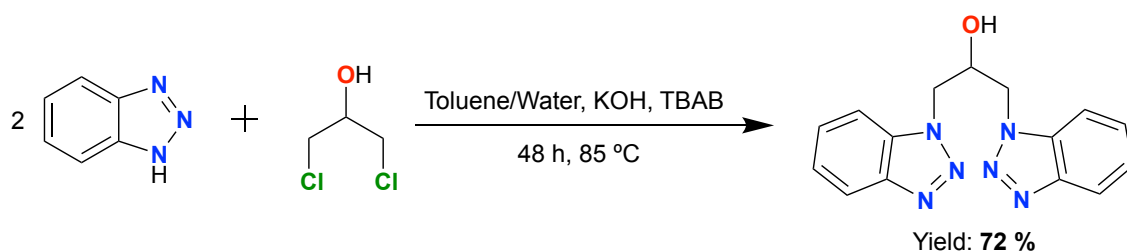

**Figure S42.** Synthesis of the ligand (1). TBAB = Tetrabutylammonium bromide

**Table S1.** Thermoanalytical results (TGA and DTG) for metal complexes.

| Compound<br>(formula)                                                            | TG<br>range /<br>°C | DTG <sub>max</sub> / °C |   | Total                  |           | Assignment                                                                             | Metallic<br>residue             |
|----------------------------------------------------------------------------------|---------------------|-------------------------|---|------------------------|-----------|----------------------------------------------------------------------------------------|---------------------------------|
|                                                                                  |                     |                         |   | Mass loss              | mass loss |                                                                                        |                                 |
|                                                                                  |                     |                         |   | Estimated (calcd.) / % |           |                                                                                        |                                 |
| <b>2</b><br>(C <sub>15</sub> H <sub>14</sub> Cl <sub>2</sub> CoN <sub>6</sub> O) | 152-352             | 254, 337                | 2 | 31.63 (31.63)          |           | loss of C <sub>6</sub> H <sub>4</sub> N <sub>3</sub> + CH <sub>4</sub>                 | CoCl <sub>2</sub> CO            |
|                                                                                  | 352-385             | 365                     | 1 | 9.52 (9.45)            | 63.55     | loss of C <sub>3</sub> H <sub>4</sub>                                                  |                                 |
|                                                                                  | 385-473             | 421                     | 1 | 12.53 (12.74)          | (62.78)   | loss of CN <sub>3</sub>                                                                |                                 |
|                                                                                  | 473-694             | 512                     | 1 | 9.86 (8.97)            |           | loss of C <sub>3</sub> H <sub>2</sub>                                                  |                                 |
| <b>3</b><br>(C <sub>15</sub> H <sub>14</sub> Cl <sub>2</sub> CuN <sub>6</sub> O) | 27-170              | 46, 148                 | 2 | 1.99 (1.88)            |           | loss of 4H <sub>2</sub>                                                                | CuCl                            |
|                                                                                  | 170-253             | 236                     | 1 | 9.25 (9.11)            | 76.79     | loss of C <sub>3</sub> H <sub>3</sub>                                                  |                                 |
|                                                                                  | 253-552             | 321                     | 1 | 62.14 (62.41)          | (76.91)   | loss of C <sub>11</sub> N <sub>6</sub> ClO                                             |                                 |
| <b>4</b><br>(C <sub>19</sub> H <sub>24</sub> CoN <sub>6</sub> O <sub>7</sub> )   | 552-694             | 694                     | 1 | 3.40 (3.50)            |           | loss of CH <sub>3</sub>                                                                | CoC <sub>2</sub> O <sub>4</sub> |
|                                                                                  | 27-239              | 88, 159, 202            | 3 | 9.38 (9.47)            |           | loss of 2H <sub>2</sub> O + C                                                          |                                 |
|                                                                                  | 239-358             | 294                     | 1 | 34.10 (34.13)          | 71.82     | loss of C <sub>6</sub> H <sub>4</sub> N <sub>3</sub> + C <sub>3</sub> H <sub>3</sub> O |                                 |
|                                                                                  | 358-573             | 420, 495                | 2 | 22.81 (22.88)          | (71.04)   | loss of C <sub>6</sub> H <sub>2</sub> N <sub>3</sub>                                   |                                 |
| <b>5</b><br>(C <sub>19</sub> H <sub>24</sub> CuN <sub>6</sub> O <sub>7</sub> )   | 573-694             | 676                     | 1 | 5.52 (4.55)            |           | loss of CH <sub>3</sub> + 4H <sub>2</sub>                                              | CuC <sub>2</sub> O <sub>4</sub> |
|                                                                                  | 64-126              | 95                      | 1 | 7.54 (7.43)            |           | loss of 2H <sub>2</sub> O + H <sub>2</sub>                                             |                                 |
|                                                                                  | 126-239             | 170, 207                | 2 | 25.35 (25.42)          | 70.06     | loss of C <sub>6</sub> H <sub>4</sub> N <sub>3</sub> + C                               |                                 |
|                                                                                  | 239-357             | 296                     | 1 | 28.37 (28.55)          | (70.40)   | loss of C <sub>6</sub> H <sub>4</sub> N <sub>3</sub> + C <sub>2</sub> H <sub>4</sub>   |                                 |
|                                                                                  | 357-694             | 405                     | 1 | 8.80 (8.99)            |           | loss of C <sub>2</sub> H <sub>6</sub> O                                                |                                 |



**Table S3.** Matrix of combinations between cobalt(II) complexes and reference drugs (FCZ and Caspofungin).

| <b>Combination</b> | <b>Drug A<br/>(Complexes)</b> | <b>Drug B<br/>(Reference<br/>drugs)</b> |
|--------------------|-------------------------------|-----------------------------------------|
| 1                  | 8X MIC                        | 0                                       |
| 2                  | 4X MIC                        | 1/4 MIC                                 |
| 3                  | 2X MIC                        | 1/2 MIC                                 |
| 4                  | MIC                           | MIC                                     |
| 5                  | 1/2 MIC                       | 2X MIC                                  |
| 6                  | 1/4 MIC                       | 4X MIC                                  |
| 7                  | 0                             | 8X MIC                                  |
